# Supplementary material for: Screening of Metabolism-Disrupting Chemicals on Pancreatic α-Cells Using In Vitro Methods
Source: MDPI journal article supplement (doi:10.3390/ijms24010231), 2022-12-23
Supplement: s1 [file s1]

## Supplementary Material

### Screening of metabolism-disrupting chemicals on pancreatic $\alpha$ -cells using in vitro methods

Supplementary Table S1. List of antibodies used in this study.

| Target antigen       | Antibody Name                                     | Manufacturer and catalogue number (Cat no.) | Species raised in  | Dilution | RRID        |
|----------------------|---------------------------------------------------|---------------------------------------------|--------------------|----------|-------------|
| BiP                  | BiP Antibody                                      | Cell Signaling Technology; Cat no. 3183     | Rabbit, polyclonal | 1:1000   | AB_668355   |
| p-eIF2 $\alpha$      | Phospho-eIF2 $\alpha$ (Ser51) (119A11)            | Cell Signaling Technology; Cat no. 3597     | Rabbit, monoclonal | 1:1000   | AB_390740   |
| $\alpha$ -Tubulin    | Monoclonal Anti- $\alpha$ Tubulin antibody        | Sigma; Cat no. T9026                        | Mouse, monoclonal  | 1:5000   | AB_477593   |
| Goat anti-mouse IgG  | Goat Anti-Mouse IgG (H+L) HRP Conjugate antibody  | Bio-rad; Cat no. 170-6516                   | Goat, Polyclonal   | 1:5000   | AB_11125547 |
| Goat anti-rabbit IgG | Goat Anti-Rabbit IgG (H+L) HRP Conjugate antibody | Bio-rad; Cat no. 170-6515                   | Goat, Polyclonal   | 1:5000   | AB_11125142 |

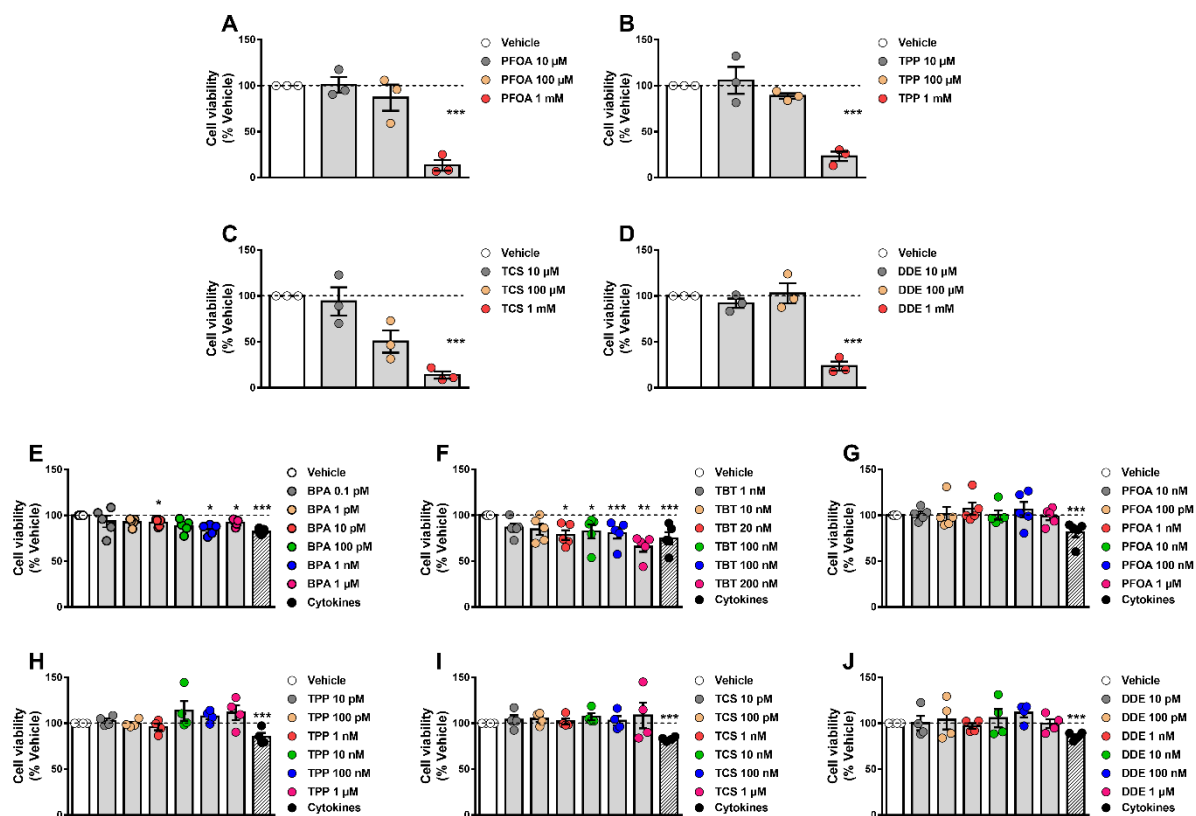

**Supplementary Figure S1.  $\alpha$ -cell viability upon MDC exposure.** (A-D)  $\alpha$ TC1-9 cells were treated with vehicle (DMSO) or different doses of PFOA (A), TPP (B), TCS (C), or DDE (D) for 48 h. (E-J)  $\alpha$ TC1-9 cells were treated with vehicle (DMSO) or different doses of BPA (E), TBT (F), PFOA (G), TPP (H), TCS (I), or DDE (J) for 72 h. A cocktail of the cytokines IL-1 $\beta$  + IFN $\gamma$  (50 and 1000 U/ml, respectively) was used as a positive control. Cell viability was evaluated by MTT assay. Results are expressed as % vehicle-treated cells. Data are shown as means  $\pm$  SEM (n = 3-5 independent experiments, where each dot represents an independent experiment). \*  $p \leq 0.05$ , \*\*  $p \leq 0.01$  and \*\*\*  $p \leq 0.001$  vs. Vehicle. MDCs vs. Vehicle by one-way ANOVA; Cytokines vs. Vehicle by two-tailed Student's  $t$  test.
